# Supplementary material
Source: publisher figshare collection journal article supplement (https://karger.figshare.com/ndownloader/files/8716624)
Supplement: Supplementary file 1 [file 8716624]

**Supplemental Materials**

**Saam, et al.**

**Patients tested at a laboratory for hereditary cancer syndromes show overlap for multiple syndromes in their personal and familial cancer histories.**

**2013 HBOC Criteria**

*National Comprehensive Cancer Network. Genetic/Familial High-Risk Assessment: Breast and Ovarian. NCCN Clinical Practice Guidelines in Oncology. 2013(1.2013).*

Patients with a personal history of breast cancer met HBOC testing criteria if they had one or more of the following:

- Diagnosed ≤ 45 years of age
- Diagnosed ≤ 50 years of age with:
  - Two breast primaries when first breast cancer diagnosis occurred*
  - ≥ 1 first, second, or third degree relative with breast cancer at any age
  - An unknown or limited family history
- Diagnosed ≤ 60 years of age with a triple-negative breast cancer
- Diagnosed at any age with:
  - ≥ 1 first, second, or third degree relative with breast cancer diagnosed ≤ 50 years of age and/or ≥ 1 first, second, or third degree relative with epithelial ovarian** cancer
  - ≥ 2 first, second, or third degree relatives with breast cancer at any age
  - ≥ 2 first, second, or third degree relatives with pancreatic cancer or aggressive prostate cancer (Gleason score ≥ 7) at any age
  - A first, second, or third degree male relative with breast cancer
  - An ancestry associated with higher mutation frequency (eg Ashkenazi Jewish)
- Personal history of epithelial ovarian** cancer
- Personal history of male breast cancer
- Personal history of pancreatic cancer or aggressive prostate cancer (Gleason score ≥ 7) at any age with ≥ 2 first, second, or third degree relative with breast and/or ovarian** and/or pancreatic or aggressive prostate cancer (Gleason score ≥ 7) at any age

Unaffected patients meet HBOC testing criteria if they have:

- A first or second degree relative meeting any of the above criteria
- A third degree relative with breast cancer and/or ovarian** cancer and who has ≥ 2 first, second, or third degree relatives with breast cancer (at least one with a breast cancer diagnosed ≤ 50 years of age) and/or ovarian* cancer

*includes bilateral (contralateral) disease

**includes fallopian tube and primary peritoneal cancers
